# Supplementary material for: Effects of Late Administration of Pentoxifylline and Tocotrienols in an Image-Guided Rat Model of Localized Heart Irradiation
Source: PubMed Central journal article supplement (PMC3718790; doi:10.1371/journal.pone.0068762), 2013-07-22
Supplement: pone.0068762.s007.pdf [file pone.0068762.s007.pdf]

**Table S1. Echocardiographic M-mode analysis parameters at 3 months and 6 months after local heart irradiation.**

|                                         | 3 months after irradiation |                | 6 months after irradiation |                |                           |                              |
|-----------------------------------------|----------------------------|----------------|----------------------------|----------------|---------------------------|------------------------------|
|                                         | Sham                       | 21 Gy          | Sham                       | 21 Gy          | 21 Gy + PTX               | 21 Gy + PTX/TSB              |
| LVAW in diastole (mm)                   | 1.71 ± 0.06                | 1.80 ± 0.03    | 1.80 ± 0.05                | 1.84 ± 0.04    | 1.68 ± 0.05 <sup>†</sup>  | 1.81 ± 0.05                  |
| LVAW in systole (mm)                    | 2.69 ± 0.09                | 2.99 ± 0.05*   | 2.76 ± 0.10                | 3.03 ± 0.11    | 2.97 ± 0.12               | 3.04 ± 0.10*                 |
| LVPW in diastole (mm)                   | 1.72 ± 0.04                | 1.82 ± 0.03    | 1.80 ± 0.05                | 1.91 ± 0.05    | 1.84 ± 0.06               | 1.81 ± 0.05                  |
| LVPW in systole (mm)                    | 2.67 ± 0.07                | 2.88 ± 0.05*   | 2.68 ± 0.07                | 2.90 ± 0.07    | 2.76 ± 0.08               | 2.82 ± 0.08                  |
| LVID in diastole (mm)                   | 7.45 ± 0.13                | 7.66 ± 0.06    | 7.80 ± 0.15                | 8.00 ± 0.10    | 8.46 ± 0.09* <sup>†</sup> | 8.49 ± 0.09* <sup>†</sup>    |
| LVID in systole (mm)                    | 4.59 ± 0.14                | 4.45 ± 0.09    | 5.07 ± 0.19                | 4.69 ± 0.20    | 4.92 ± 0.19               | 4.92 ± 0.17                  |
| EF (%)                                  | 71.47 ± 1.50               | 74.42 ± 0.97   | 68.65 ± 1.65               | 73.77 ± 1.94   | 71.87 ± 2.48              | 73.17 ± 1.89                 |
| FS (%)                                  | 42.39 ± 1.25               | 45.20 ± 0.92   | 40.16 ± 1.33               | 44.91 ± 1.78   | 43.27 ± 2.22              | 44.42 ± 1.65                 |
| Stroke volume (μl)                      | 215.53 ± 5.43              | 238.8 ± 4.37*  | 238.10 ± 5.11              | 265.04 ± 6.94  | 288.94 ± 13.39*           | 299.59 ± 11.68* <sup>†</sup> |
| Heart rate (bpm)                        | 325.9 ± 4.03               | 307.62 ± 3.03* | 307.66 ± 7.13              | 279.66 ± 10.79 | 258.62 ± 17.18            | 248.14 ± 21.44*              |
| Cardiac output (ml/min)                 | 70.11 ± 1.52               | 73.30 ± 1.31   | 73.22 ± 3.97               | 73.34 ± 2.99   | 71.87 ± 2.48              | 72.51 ± 5.14                 |
| Incidence of bradycardia and arrhythmia | 0 out of 15                | 0 out of 44    | 0 out of 15                | 1 out of 15    | 5 out of 14               | 6 out of 15                  |

\*Significant difference with sham-irradiation ( $p < 0.05$ ), <sup>†</sup>Significant difference with 21 Gy ( $p < 0.05$ ).
